# Supplementary material for: Significant Electromechanical Characteristic Enhancement of Coaxial Electrospinning Core–Shell Fibers
Source: MDPI journal article supplement (doi:10.3390/polym14091739), 2022-04-25
Supplement: s1 [file s1]

## SUPPORTING INFORMATION

### *Research Article*

### **Significant electromechanical characteristic enhancement of coaxial electrospinning core-shell fibers**

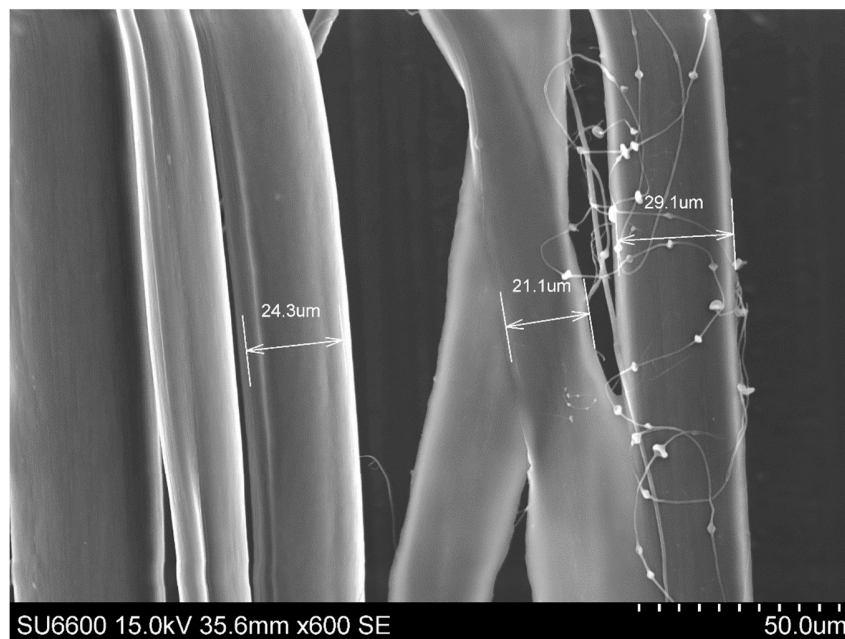

Figure S1. SEM photograph of electrospun bundles fibers with core-shell fibers, single PBLG fibers and the beads.

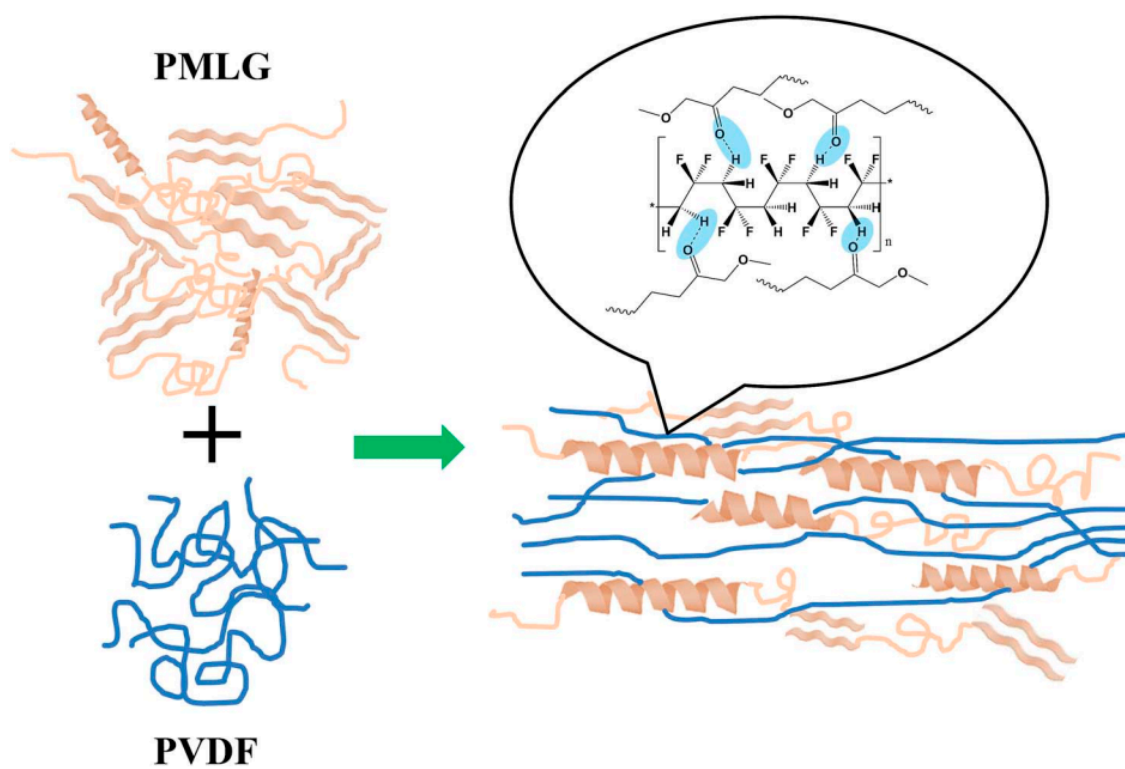

Figure S2. Conformation changes and specific interaction between PVDF and PMLG fibers – suggested by Cheng-Tang Pan *et al*
